# Supplementary material
Source: PubMed Central journal article supplement (PMC3975736)
Supplement: NIHMS529604-supplement-Supplementary_Material.pdf [file NIHMS529604-supplement-Supplementary_Material.pdf]

**Supplemental information for:**

**Poly (ADP-ribose) polymerase-1 is a key mediator of liver inflammation and fibrosis**

Short Title: PARP-1 in liver inflammation and fibrosis

Partha Mukhopadhyay<sup>1\*</sup>, Mohanraj Rajesh<sup>1\*</sup>, Zongxian Cao<sup>1\*</sup>, Béla Horváth<sup>1,2\*</sup>, Ogyi Park<sup>3\*</sup>, Hua Wang<sup>3</sup>, Katalin Erdélyi<sup>1</sup>, Eileen Holovac<sup>1</sup>, Yuping Wang<sup>1</sup>, Lucas Liaudet<sup>4</sup>, Nabila Hamdaoui<sup>5,6</sup>, Fouad Lafdil<sup>5,6</sup>, György Haskó<sup>7</sup>, Csaba Szabo<sup>8</sup>, A. Hamid Boulares<sup>9</sup>, Bin Gao<sup>3</sup> and Pal Pacher<sup>1</sup>

**Affiliations:**

<sup>1</sup>Laboratory of Physiological Studies, National Institutes of Health/NIAAA, Bethesda, MD, USA.

<sup>2</sup>Pathology and Laboratory Medicine Institute, Cleveland Clinic, Cleveland, Ohio, USA.

<sup>3</sup>Laboratory of Liver Biology, National Institutes of Health/NIAAA, Bethesda, MD, USA.

<sup>4</sup>Department of Intensive Care Medicine, BH 08-621-University Hospital Medical, Center, 1011 LAUSANNE, Switzerland.

<sup>5</sup>Institut National de la Santé et de la Recherche Médicale (INSERM), U955, Créteil, F-94000 France.

<sup>6</sup>Université Paris-Est, Faculté de Médecine, UMR-S955, Créteil, F-94000 France.

<sup>7</sup>Departments of Surgery Rutgers New Jersey Medical School, Newark, New Jersey, USA.

<sup>8</sup>Department of Anesthesiology, University of Texas Medical Branch, Galveston, TX, USA.

<sup>9</sup>The Stanley Scott Cancer Center and Department of Pharmacology, Louisiana State University Health Sciences Center, New Orleans, LA 70112, USA

\*equally contributed to this work. Correspondence to: [pacher@mail.nih.gov](mailto:pacher@mail.nih.gov)

## **Detailed Materials and Methods**

### ***Hepatic tissue samples from human subjects***

Alcoholic and hepatitis B virus-associated cirrhotic liver samples (stage 3-4 fibrosis) were collected from donor livers during liver transplantation from the Liver Tissue Cell Distribution System (LTCDS), University of Minnesota. Subjects with alcoholic cirrhosis (1 female (56 years old), and 5 males (60, 56, 48, 50, and 45 years old) were consuming more than 50g/day alcohol for at least 4-5 years. Among HBV-induced cirrhotic subjects 1 was female (46 years old) and 5 were males (45, 43, 40, 48, and 48 years old). The samples were collected by quick freezing in liquid nitrogen, and diagnosed by histological analysis. Normal healthy liver samples (3 females (32, 57, and 34 years old), and 3 males (56, 55, and 56 years old)) were also provided by the LTCDS, and represent the part of healthy donor livers that was not used for transplantation.

### ***Induction of liver injury by CCl<sub>4</sub> and treatments***

For the induction of acute liver injury by CCl<sub>4</sub>, mice were injected intraperitoneally (I.P) with a single dose of CCl<sub>4</sub> (10 % in olive oil (Sigma chemicals), 2 mL/kg) and sacrificed after 48 hrs. Chronic liver injury was instituted with CCl<sub>4</sub> (10 % in olive oil (Sigma chemicals), 2 mL/kg, 3 times/week) by intraperitoneal injections for 4 weeks (1). The PARP inhibitors (5-aminoisoquinolinone-hydrochloride (termed AIQ) and N-(2-oxo-5,6-dihydro-phenanthridin-2-yl)-N,N-dimethylacetamide (PJ34) were obtained from Enzo Life Sciences and Sigma Chemicals, respectively). Mice were treated with the PARP inhibitors at 10 mg/kg/day i.p. In a separate set of experiments, mice were injected with CCl<sub>4</sub> alone for 4 weeks, and then treated with PARP inhibitors (10 mg/kg/day) or vehicle in the presence of CCl<sub>4</sub> for an additional 4 weeks. The respective control groups were treated with vehicle (2 mL/kg olive oil). After the treatments, mice were sacrificed, livers were excised and were frozen in liquid nitrogen or fixed in 10% neutral buffered formalin for biochemical and histological evaluations respectively. All the animals were provided with food and water *ad libitum*.

### ***Induction of liver fibrosis by bile duct ligation (BDL)***

Mice were anesthetized by intraperitoneal injection of ketamine (100 mg/kg) and xylazine (10 mg/kg). The abdomen was opened by a midline laparotomy and the common bile duct was identified and carefully separated from the surrounding connective tissue and hepatic artery and portal vein. The common bile duct was ligated with 5-0 silk thread at two locations close to the beginning of its intrapancreatic portion and was transected between the two ligatures. The

gallbladder was not removed. In sham-operated control, the common bile duct was identified but not ligated or transected. The incision was closed with metal clips. The mice were sacrificed two weeks after the surgery (2). To test the effect of PARP inhibition on BDL-induced hepatic fibrosis, mice received one dose of pre-operative IP injection of PJ34 or AIQ and daily post-operative IP injection of the inhibitors (10mg/kg/day) for two weeks.

#### ***Determination of liver function***

On the day of the sacrifice, blood was collected and serum was prepared immediately followed by the determination of the serum levels of alanine aminotransferase (ALT) using a clinical chemistry analyzer - Idexx VetTest 8008 (Idexx Laboratories, Westbrook, ME, USA) (3, 4)

#### ***Histology and immunohistochemistry***

After routine processing paraffin liver sections (5µm) were staining with hematoxylin and eosin (H&E) for histological evaluation of liver injury by CCl<sub>4</sub> (3). Immunostaining for  $\alpha$  smooth muscle actin ( $\alpha$ -SMA) was performed on paraffin sections using  $\alpha$ -SMA antibody (clone 1A4, Dako, Carpinteria, CA) and developed using a biotinylated alkaline phosphatase-conjugated secondary antibody and DAB substrate kits from Vector laboratories.

#### ***Picro-Sirius Red staining, quantitative analysis of hepatic fibrosis***

The mouse live tissue samples were fixed in 10% buffered formalin and then embedded in paraffin for sectioning. Hepatic fibrosis was analyzed by Picro-Sirius Red staining according to standard methods in routine pathology. The amount of collagen deposition was quantified by measuring the proportion of Sirius Red-stained area using color thresholding and measurement of area fraction with IMAGEJ software (NIH Public Domain). Images taken from 10 random 100× fields from the liver lobe of each animal were measured (n=4-7 animals/group).

#### ***Oil Red O staining for hepatic lipid accumulation***

Liver samples embedded in optimal cutting temperature (OCT) compound were cut at 10 µm sections and stained with Oil Red O to evaluate the hepatic lipid content. Briefly, cryosections were air dried and fixed in 10% formalin and then stained with 0.5% Oil Red O in propylene glycol for 10 min at 60°C and subsequently washed with 85% propylene glycol. Sections were counterstained with hematoxylin, washed in water and mounted with aqueous solution.

#### ***Determination of hepatic triglyceride content***

Triglyceride content was measured from liver tissue by Triglyceride Quantification Colorimetric Kit (Biovision) according to manufacturer's instruction.

#### ***Determination of PARP activity***

PARP activities in the hepatic tissue homogenates were performed using the colorimetric assay kit (Trevigen Inc., Gaithersburg, MD). In brief, the assay was based on determining the biotinylated poly (ADP-ribose) incorporation on to the histone proteins coated in ELISA wells. Each sample was run in duplicate and the values were expressed as units/mg protein (4, 5)

#### ***Reverse Transcription and real time PCR***

Hepatic tissues were homogenized and total RNA was isolated using Trizol LS reagent (Invitrogen) according to manufacturer's instruction. The RNA was treated with RNase-free DNase (Ambion, TX) to remove traces of genomic DNA contamination. Total RNA was then reverse-transcribed to cDNA using the Super-Script II (Invitrogen) and the target genes were amplified using the standard real time PCR kit (Applied Biosystems, Foster city CA). The amplification was performed in real time PCR system (Applied Biosystems, CA) using the following conditions: initial denaturation at 95 °C for 2 min, followed by 35 cycles were performed at 95 °C for 30 s and 60 °C for 30s. Primers used for amplification were reported by us or others earlier (4-8) and are provided in Supplemental Tables 1 and 2.

#### ***Western immunoblot analysis***

Hepatic tissues were homogenized in mammalian tissue protein extraction reagent (TPER, Pierce Biotechnology, IL) supplemented with protease and phosphatase inhibitors (Roche, GmbH). Then samples were kept on ice for 1 hr, followed by centrifugation at 13,000 rpm for 30 min at 4°C. The supernatants were carefully collected and protein content was determined using Lowry assay kit (Bio-Rad, CA). 30 µg of protein was resolved in 12% SDS-PAGE and transferred to nitrocellulose membranes (GE Healthcare). Blocking was performed for 2 hr at room temperature with 5% non-fat skimmed milk powder prepared in PBS containing 0.1% tween 20 (Sigma). After washing with PBST, membranes were probed with either mouse monoclonal  $\alpha$ -SMA (Sigma chemicals or Abcam ) or rabbit polyclonal anti-poly(ADP ribose)/ PAR antibody (BDBiosciences, or Trevigen) or Collagen 1 (Abcam) and were used at 1:1000 dilution over night at 4°C. After subsequent washing with PBST, the membrane was incubated with secondary antibody - antimouse/ rabbit HRP (Applied bio systems) at RT for 1 hr. Then the membranes were developed using chemiluminescence detection kit (Super signal -west pico substrate,

Pierce). To confirm uniform loading, membranes were stripped and re-probed with  $\beta$ - actin (Chemicon, CA) or GAPDH (Abcam)

#### ***Determination of mitochondrial complex activities***

Microplate assay kits (Abcam) were used to determine the activity of mitochondrial complex I, complex II, and complex IV according to the manufacturer's instructions. The complex enzymes were immunocaptured and activities were measured kinetics. Activities were calculated based on the manufacturer's instruction. Complex activities were expressed as fold change compared to the liver samples of the vehicle-treated mice as described (4).

#### ***Mitochondrial DNA content:***

Mitochondrial DNA (mtDNA) determination was performed as previously described (7, 8) and the primers are provided in Supplemental Tables 1 and 2.

#### ***Hepatic 4-hydroxynonenal (4-HNE) content***

Levels of hepatic 4-HNE were measured by using the kit procured from (Cell Biolabs, San Diego, CA, USA). In brief, BSA or hepatic tissue homogenates (10 $\mu$ g/ml) were absorbed on to the 96-well plates for 12h at 4°C. The HNE adducts contained in the samples were captured with anti 4-HNE antibody, followed by a HRP-conjugated secondary antibody. The 4-HNE in the samples was determined based on standard curve generated with BSA-HNE as per the protocol supplied by the manufacturer (4).

#### ***Hepatic protein 3-nitrotyrosine (3-NT) content***

Hepatic 3-NT levels were determined with ELISA kit from Hycult biotechnology, Cell sciences, Canton, MA, USA, as described earlier (4).

#### ***Myeloperoxidase (MPO) activity***

MPO activities in the hepatic tissues were determined by fluorometric kit (Enzo life sciences, Plymouth Meeting, PA, USA). In brief the MPO in the samples oxidizes the non-fluorescent substrate in the presence of hydrogen peroxide to yield the fluorescent analog, which was measured at 590-600 nm emission wavelengths. The standard curve was plotted with recombinant MPO supplied with the kit (4, 5).

#### ***Determination of hepatic hydroxyproline content***

The levels of hepatic hydroxyproline content in the tissue hydrolysates, a direct measure of the collagen content, were determined by the kit obtained from (BioVision, Mountain View, CA). In brief, 50 mg of hepatic tissue was homogenized in 500  $\mu$ l of dH<sub>2</sub>O and to this 200  $\mu$ l of concentrated HCl (12N) was added and hydrolyzed at 110 °C for 4 hrs. Then 10  $\mu$ l of the hydrolysates were evaporated to dryness under vacuum and to this 100  $\mu$ l of chloramine T reagent was added and incubated for 5 min. in the subsequent step 100  $\mu$ l Ehrlich's reagent (dimethyl amino benzaldehyde) was added and incubated for 90 minutes at 60 °C, then samples/standards were transferred to 96 well plates and absorbance was measured at 560 nm. The hydroxyproline content in the tissue hydrolysates was determined from the standard curve of 4-hydroxy-L-proline as per the instructions supplied by the vendor.

#### ***Isolation and culture of mouse hepatocytes and hepatic stellate cells***

Primary mouse hepatocytes were isolated as described earlier (3). Mouse liver hepatic stellate cells (HSC) were isolated by in situ collagenase perfusion and differential centrifugation on OptiPrep density gradients. After perfusion of the liver of the deeply anesthetized mice, the livers were excised and the HSL cells were isolated(3, 9).

#### ***Determination of hepatocyte apoptosis/cell death by flow cytometer***

Mice primary hepatocytes were treated with hydrogen peroxide (H<sub>2</sub>O<sub>2</sub>, 3mmol/L) in the presence or absence of PARP inhibitors (AIQ and PJ34 - 3mmol/L each) for 16h and apoptosis/cell death was determined with flow cytometry. Annexin V-APC was used as early apoptosis marker whereas Sytox Green was used as cell necrosis marker as described earlier (10).

#### ***Activation of hepatic stellate cells (HSC)***

Isolated HSC were plated on to 96 well plates and maintained with RPMI 1640 medium with 10% FBS and supplemented antibiotic/antimycotic agents for 24 hrs or 7 days in the presence or absence of PARP inhibitors (AIQ and PJ34 10 mmol/L each). In a separate set of experiments PARP<sup>+/+</sup> and PARP<sup>-/-</sup> cells were compared under similar conditions (1 and 7 days). The effects of PARP inhibition or genetic deletion of PARP1 on HSC activation markers were determined by the mRNA/protein expression of  $\alpha$ -SMA, collagen-1, and other pro-fibrotic markers described in the corresponding results sections and figures.

## Supplemental Figure legends

### ***Suppl. Fig.1. Acute CCl<sub>4</sub> treatment induces time-dependent liver injury and PARP activation.***

In this set of acute experiments, mice were treated with a single high dose of CCl<sub>4</sub> I.P. as described in methods. (A) Shows the time-dependent changes in serum ALT activities following a single high dose of CCl<sub>4</sub> injection. (B and C) Demonstrates alterations in oxidative/nitrative stress markers such as (B) 3-NT and (C) 4-HNE, respectively. (D) Shows time-dependent alterations of PARP activities in the hepatic tissues and (E) representative immunoblot with two different anti-PAR antibodies (Trevigen and BD) depicting the poly(ADP)ribosylated proteins. n=8-10/group for A-D; P\* <0.05 vs. vehicle.

### ***Suppl. Fig. 2. Deficiency of PARP1<sup>-/-</sup> attenuates the CCl<sub>4</sub>-induced acute liver injury and inflammation.***

For these experiments liver tissues were collected 48 hours following a single high dose of I.P. CCl<sub>4</sub> injection as described in methods. (A) Shows the representative images of hematoxylin-eosin (H&E) stained paraffin liver sections from the groups as indicated. The scale depicts 100µm. (B) Shows the serum ALT levels in the respective groups. (C) Depicts myeloperoxidase (MPO) activities in the hepatic tissues and (D) shows the mRNA expression of pro-inflammatory cytokines (TNF-α, IL1-β) and chemokines (MIP1-α, MIP2, MCP-1) n=8/group, \*P<0.05 vs. PARP<sup>+/+</sup>/PARP1<sup>-/-</sup> mice treated with vehicle. #P< 0.05 vs. PARP<sup>+/+</sup>+CCl<sub>4</sub>.

### ***Suppl. Fig. 3. Pharmacological inhibition of PARP ameliorates CCl<sub>4</sub>-induced acute liver injury and inflammation.***

For these experiments liver tissues were collected 48 hours following a single high dose of I.P. CCl<sub>4</sub> injection as described in methods. (A) Representative H&E images from the respective groups are shown. The scale depicts 100µm. (B) Shows the serum ALT levels, n=6-12/group, \*P< 0.05 vs. vehicle/PJ34/AIQ alone; #P < 0.05 vs. CCl<sub>4</sub> + PJ34/AIQ. (C) shows the mRNA expression of pro-inflammatory cytokines (TNF-α, IL1-β) and chemokines (MIP1-α, MIP2, MCP-1) from the hepatic tissues, n=8/group, \*P< 0.05 vs. vehicle/PJ34/AIQ alone; #P< 0.05 vs. CCl<sub>4</sub> + PJ34/AIQ.

### ***Suppl. Fig. 4. Genetic ablation or pharmacological inhibition of PARP attenuates chronic CCl<sub>4</sub>-treatment induced stellate cell activation in vivo***

For these experiments liver tissues were collected 4 weeks following multiple CCl<sub>4</sub> injection as described in the methods. Part (A) shows representative images of paraffin embedded liver sections stained with  $\alpha$ -SMA, a marker for HSC activation, in PARP<sup>+/+</sup>/PARP-1<sup>-/-</sup> mice treated with vehicle or CCl<sub>4</sub> for 4 weeks, and the quantification of the staining right. Part (B) shows representative images of  $\alpha$ -SMA staining in mice treated with vehicle, PARP inhibitors alone, or their combination with CCl<sub>4</sub>, and the quantification of the staining right. The scale depicts 100 $\mu$ m in panels A and B. n=8/group, \*P<0.05 vehicle vs. CCl<sub>4</sub> in PARP<sup>+/+</sup>/PARP-1<sup>-/-</sup> mice (A) or vehicle/PJ34/AIQ alone vs. CCl<sub>4</sub> (B); #P<0.05 CCl<sub>4</sub> in PARP<sup>+/+</sup> vs. PARP-1<sup>-/-</sup> mice (A) or CCl<sub>4</sub> vs. CCl<sub>4</sub>+PJ34/AIQ in WT mice (B).

***Suppl. Fig. 5. Pharmacological inhibition of PARP attenuates the established stellate cell activation.*** After reaching 4 weeks of CCl<sub>4</sub> or vehicle treatment mice continued to receive CCl<sub>4</sub>, vehicle, PARP inhibitors alone or PARP inhibitors in combination with CCl<sub>4</sub> for additional 4 weeks. Representative liver sections stained for  $\alpha$ -SMA expression and its quantification. n=8/group, \*P<0.05 vs. vehicle/PJ34/AIQ alone; #P< 0.05 CCl<sub>4</sub> vs. CCl<sub>4</sub> + PJ34/AIQ.

***Suppl. Fig. 6. Pharmacological inhibition of PARP or chronic CCl<sub>4</sub> exposure or their combination does not alter liver fat content.***

Part (A) shows representative liver sections stained with Oil Red O and light hematoxylin of mice treated with vehicle, CCl<sub>4</sub> or CCl<sub>4</sub>+PJ34/AIQ. Please note absence of positive (red) Oil Red O staining, indicating absence of significant lipid accumulation in these liver sections. In contrast, the positive control liver sections from an alcohol-induced steatohepatitis model show nice positive staining. Part (B) shows quantification of hepatic triglyceride content in livers, which is essentially similar to the results described in part A. n=8/group, \*P<0.05 vs. vehicle.

## **Supplemental References**

1. Park O, Jeong W-IL, Wang L, Wang H, Lian Z-X, Gershwin ME, Gao B. Diverse roles of invariant natural killer T cells in liver injury and fibrosis induced by carbon tetrachloride. *Hepatology* 2009;49:1683-1694.



2. Guillot A, Hamdaoui N, Bizy A, Zoltani K, Souktani R, Zafrani ES, Mallat A, et al. Cannabinoid receptor 2 counteracts interleukin-17-induced immune and fibrogenic responses in mouse liver. *Hepatology* 2013 in press.
3. Cao Z, Mulvihill MM, Mukhopadhyay P, Xu H, Erdelyi K, Hao E, Holovac E, et al. Monoacylglycerol lipase controls endocannabinoid and eicosanoid signaling and hepatic injury in mice. *Gastroenterology* 2013;144:808-817.
4. Mukhopadhyay P, Horvath B, Zsengeller Z, Batkai S, Cao Z, Kechrid M, Holovac E, et al. Mitochondrial reactive oxygen species generation triggers inflammatory response and tissue injury associated with hepatic ischemia-reperfusion: therapeutic potential of mitochondrially targeted antioxidants. *Free radical biology & medicine* 2012;53:1123-1138.
5. Mukhopadhyay P, Rajesh M, Horváth B, Bátkai S, Park O, Tanchian G, Gao RY, et al. Cannabidiol protects against hepatic ischemia/reperfusion injury by attenuating inflammatory signaling and response, oxidative/nitrative stress, and cell death. *Free Radical Biology and Medicine* 2011;50:1368-1381.
6. Rajesh M, Mukhopadhyay P, Batkai S, Patel V, Saito K, Matsumoto S, Kashiwaya Y, et al. Cannabidiol attenuates cardiac dysfunction, oxidative stress, fibrosis, and inflammatory and cell death signaling pathways in diabetic cardiomyopathy. *Journal of the American College of Cardiology* 2010;56:2115-2125.
7. Bai P, Canto C, Oudart H, Brunyanszki A, Cen Y, Thomas C, Yamamoto H, et al. PARP-1 inhibition increases mitochondrial metabolism through SIRT1 activation. *Cell Metabolism* 2011;13:461-468.
8. Bai P, Canto C, Brunyanszki A, Huber A, Szanto M, Cen Y, Yamamoto H, et al. PARP-2 regulates SIRT1 expression and whole-body energy expenditure. *Cell Metabolism* 2011;13:450-460.
9. Jeong WI, Park O, Radaeva S, Gao B. STAT1 inhibits liver fibrosis in mice by inhibiting stellate cell proliferation and stimulating NK cell cytotoxicity. *Hepatology* 2006;44:1441-1451.

10. Mukhopadhyay P, Rajesh M, Hasko G, Hawkins BJ, Madesh M, Pacher P. Simultaneous detection of apoptosis and mitochondrial superoxide production in live cells by flow cytometry and confocal microscopy. *Nature Protocols* 2007;2:2295-2301.

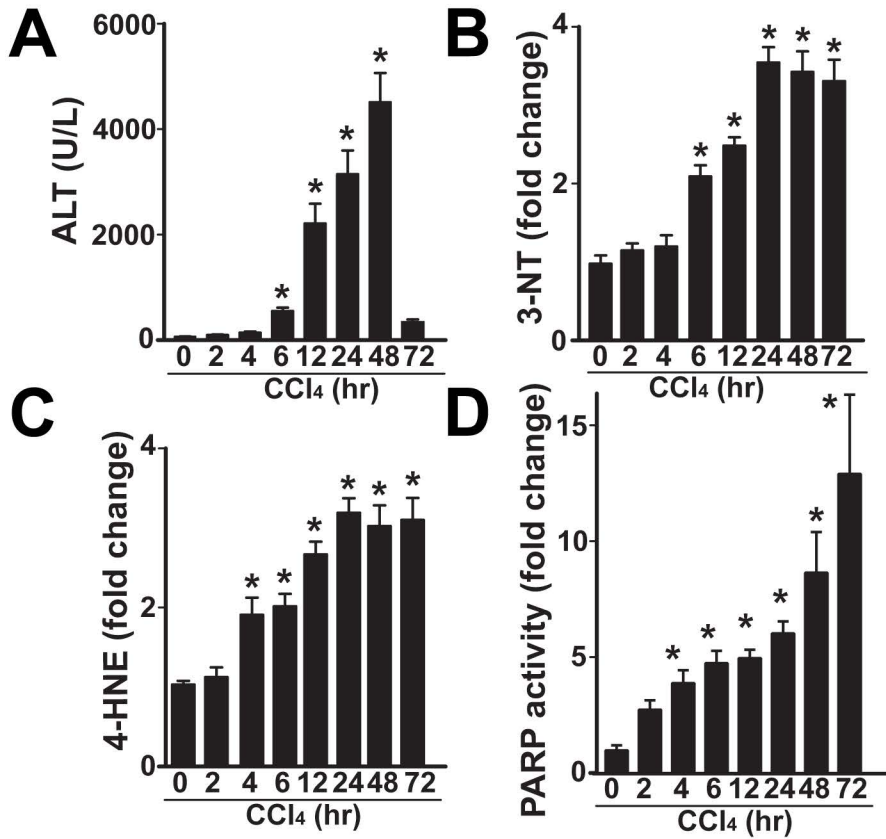

Time      0      2      4      6      12      24      48      72h

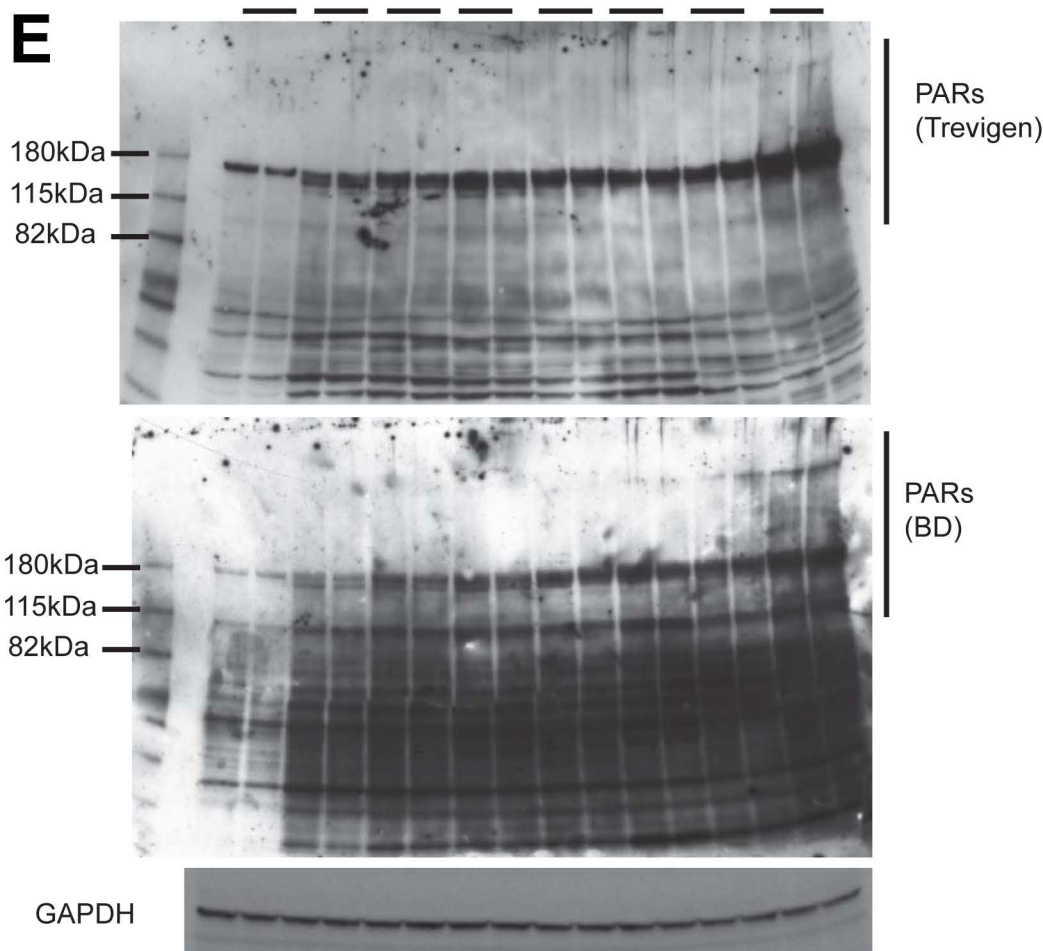

Suppl. Fig. 1

**A**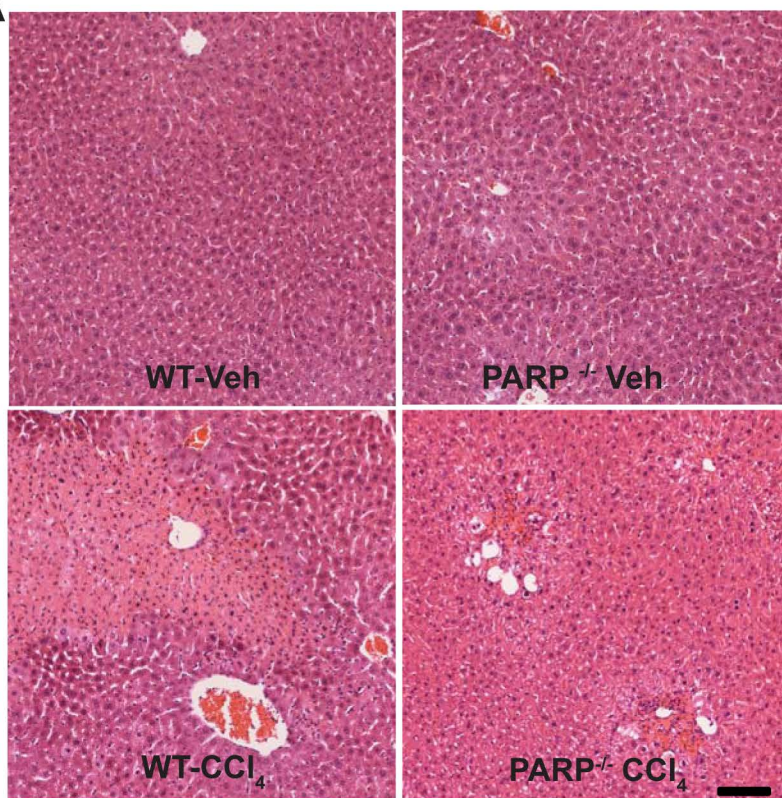**B**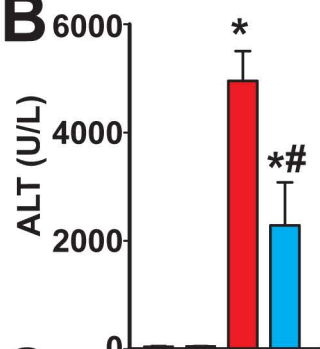**C**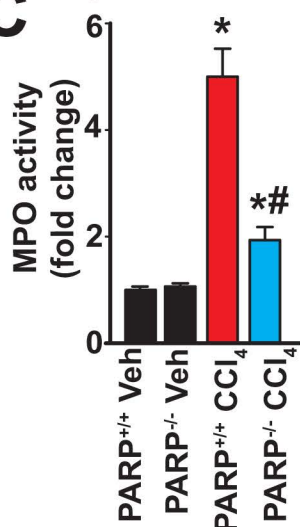**D**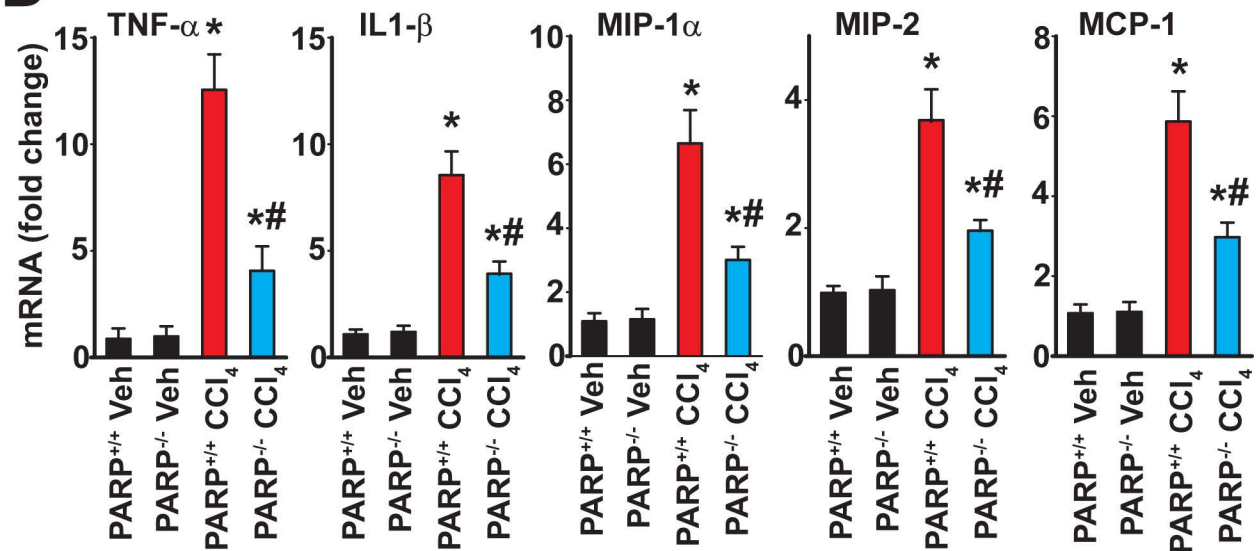

Suppl. Fig. 2

**A**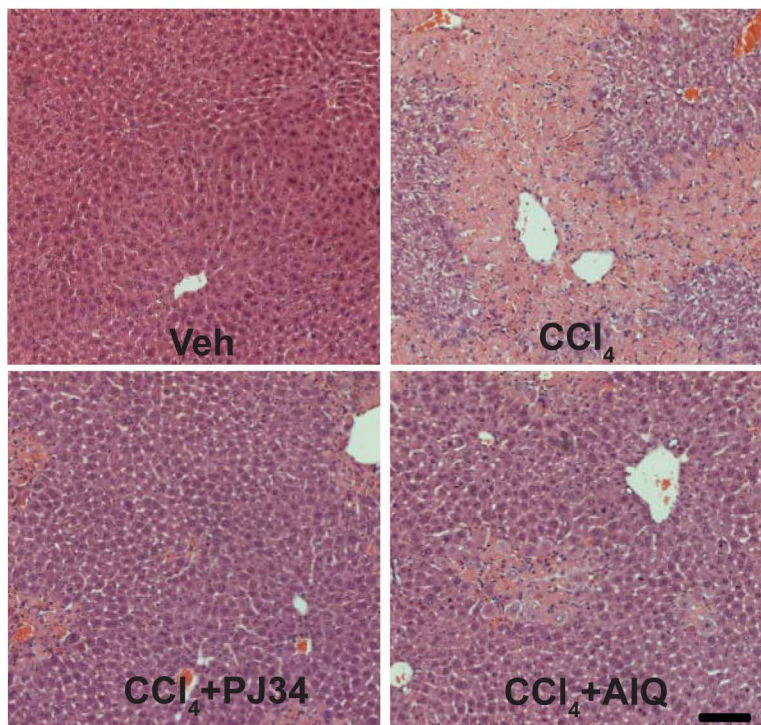**B**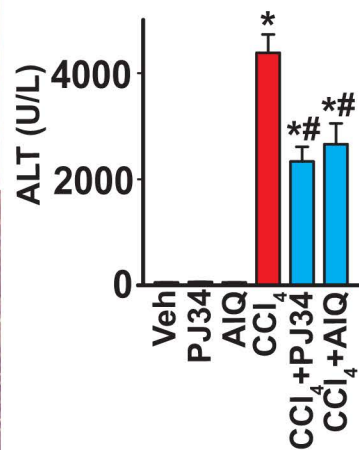**C**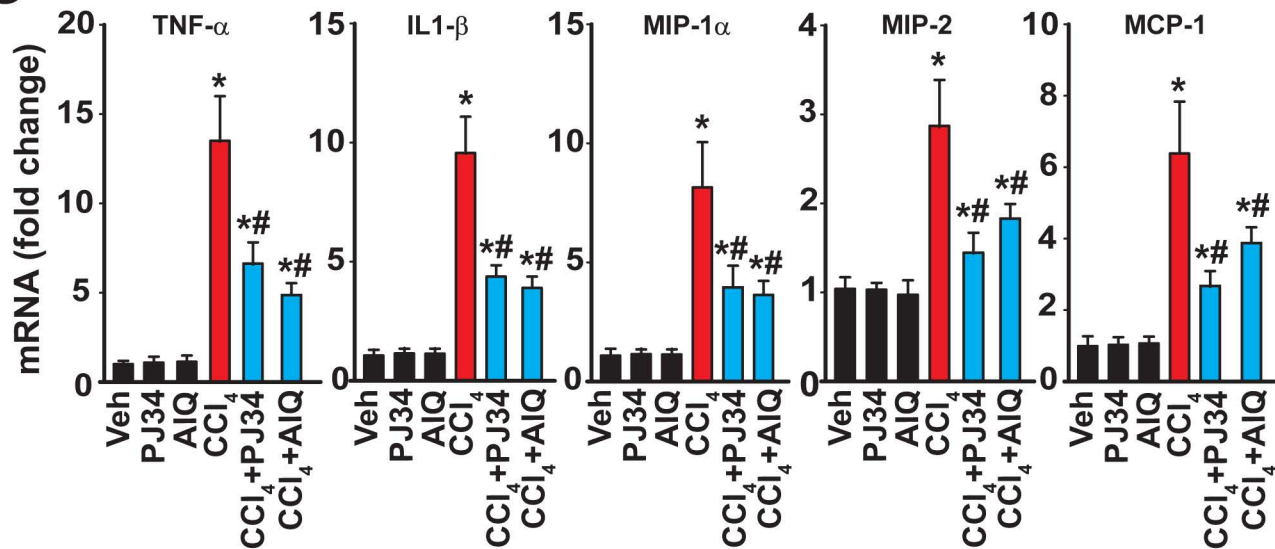

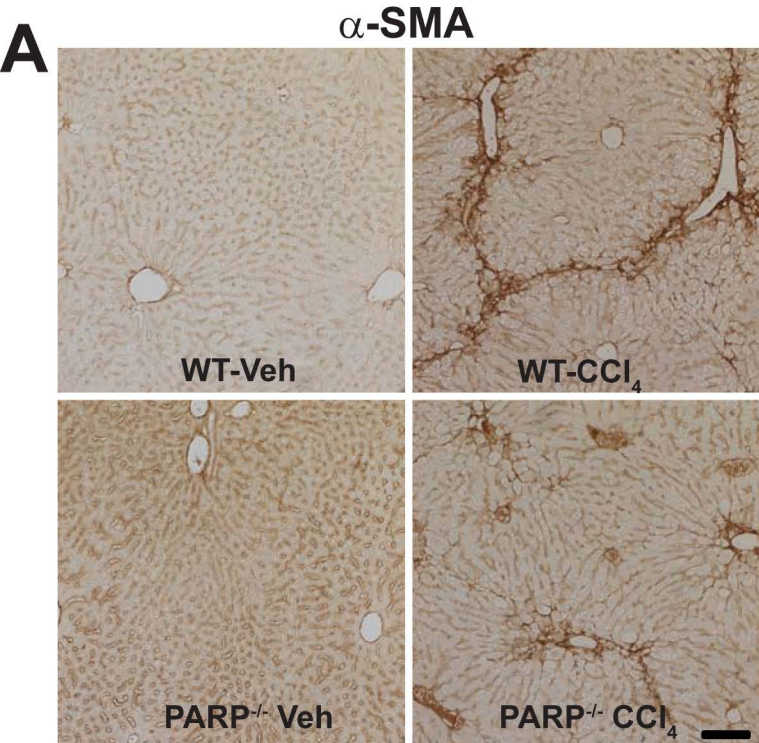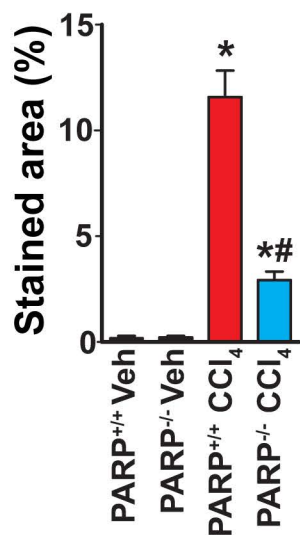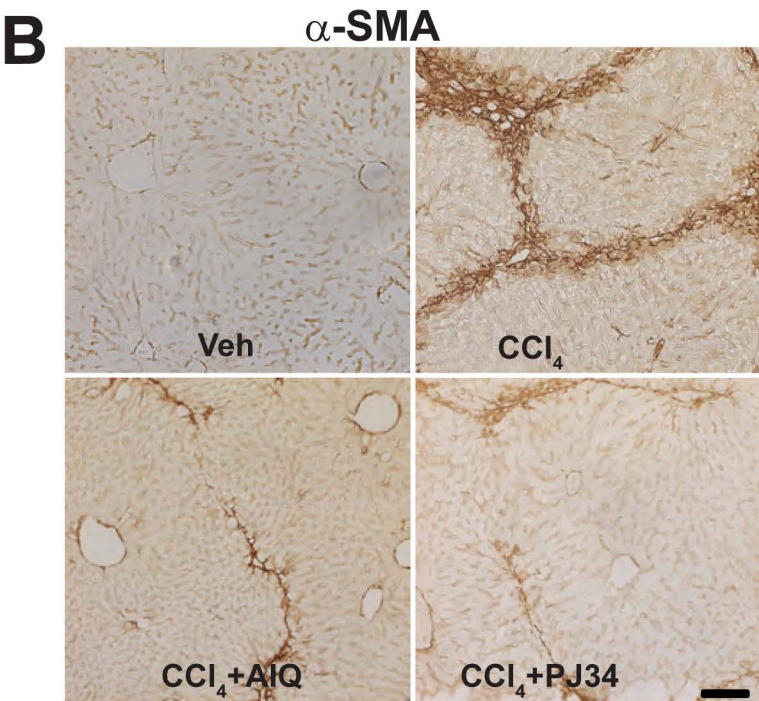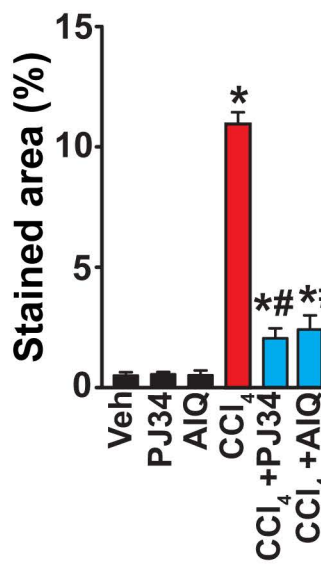

Suppl. Fig. 4

$\alpha$ SMA

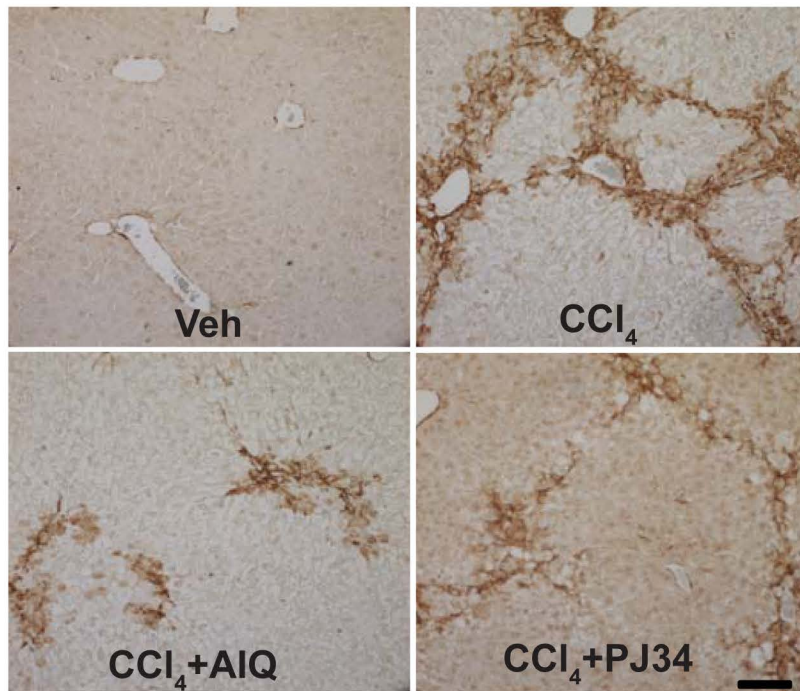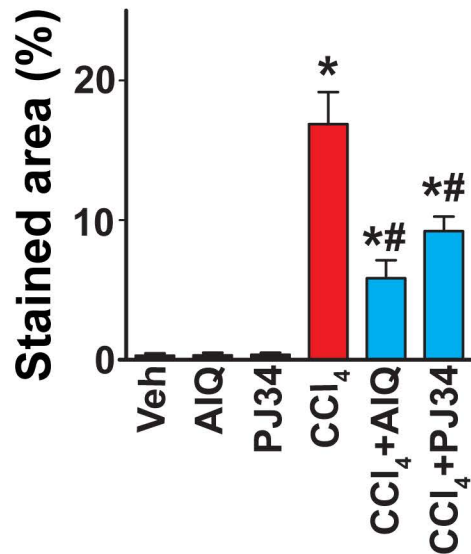

Suppl. Fig. 5

# A

## Oil Red O

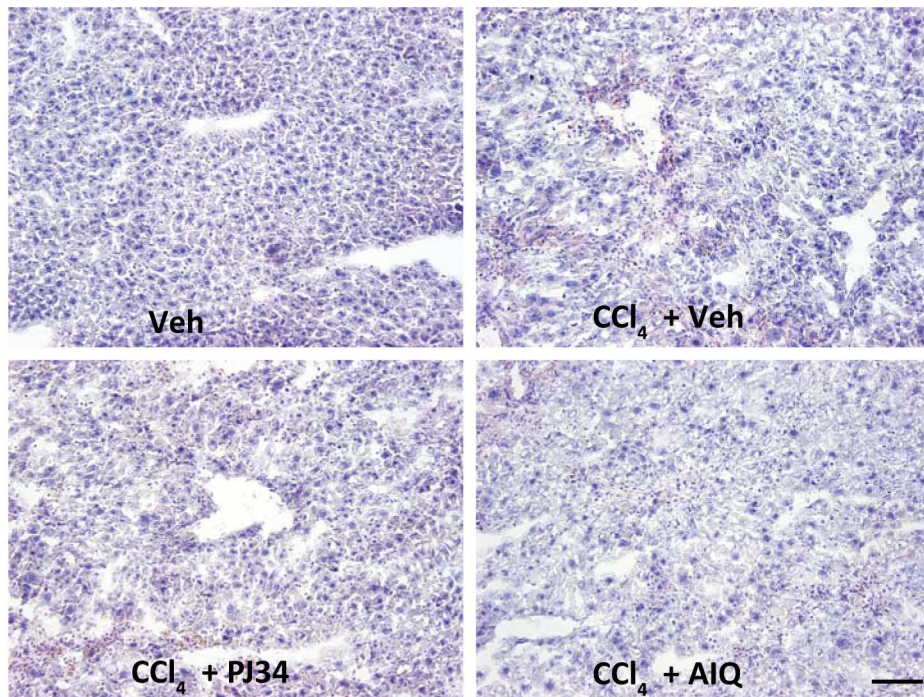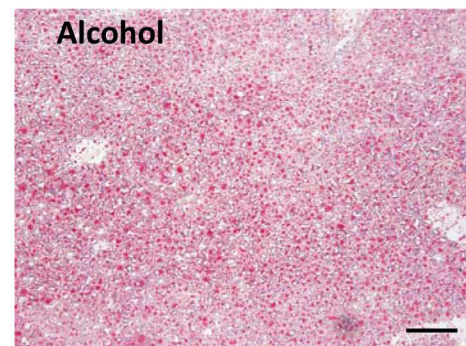

# B

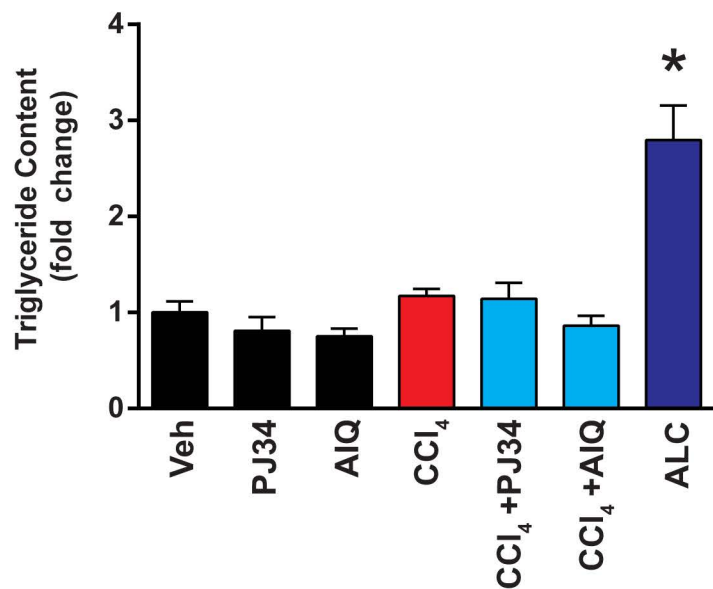



**Table S1:- List of primers and their sequences used in this study.**

| Gene             | Forward primer            | Reverse primer             |
|------------------|---------------------------|----------------------------|
| TNF- $\alpha$    | TTCATTCCTGCTTGTGGCAG      | TCCACTTGGTGGTTTGCTACG      |
| IL-1 $\beta$     | AAAAAAGCCTCGTGCTGTCG      | GTCGTTGCTTGGTTCTCCTTG      |
| MIP-1 $\alpha$   | TGCCCTTGCTGTTCTTCTCTG     | CAACGATGAATTGGCGTGG        |
| MIP-2            | AGTGAAGTGCCTGTCAATGC      | AGGCAAACCTTTTGACCGCC       |
| MCP-1            | TCAGCCAGATGCAGTTAACGC     | TCTGGACCCATTCTTCTTGG       |
| $\alpha$ -SMA    | CTGACAGAGGCACCACTGAA      | CATCTCCAGAGTCCAGCACA       |
| TGF-b            | TCTACAACCAACACAACCCGG     | GAGCGCACAATCATGTTGGAC      |
| Fibronectin      | TGCAGTGACCAACATTGATCGC    | AAAAGCTCCCGGATTCCATCC      |
| CTGF             | ACTATGATGCGAGCCAACTGC     | TGTCCGGATGCACTTTTTGC       |
| Collagen1        | TGGCCTTGGAGGAACTTTG       | CTTGAAACCTTGTGGACCAG       |
| Ndufa2           | GCACACATTTCCCCACACTG      | CCCAACCTGCCATTCTGAT        |
| Ndufb3           | TACCACAAACGCAGCAAACC      | AAGGGACGCCATTAGAAACG       |
| COX17            | CGTGATGCGTGCATCATTGA      | CATTCACAAAGTAGGCCACC       |
| ATP5g1           | GCTGCTTGAGAGATGGGTTC      | AGTTGGTGTGGCTGGATCA        |
| UCP1             | GGCCCTTGTAACAACAAAATAC    | GGCAACAAGAGCTGACAGTAAAT    |
| UCP3             | ACTCCAGCGTCGCCATCAGGATTCT | TAAACAGGTGAGACTCCAGCAACTT  |
| MCAD             | GATCGCAATGGGTGCTTTTGATAGA | AGCTGATTGGCAATGTCTCCAGCAA  |
| ACO              | CCCAACTGTGACTTCCATT       | GGCATGTAACCCGTAGCACT       |
| ACC1             | GACAGACTGATCGCAGAGAAAG    | TGGAGAGCCCCACACACA         |
| ACC2             | CCCAGCCGAGTTTGTCACT       | GGCGATGAGCACCTTCTCTA       |
| GK               | ACATTGTGCGCCGTGCCTGTGAA   | AGCCTGCGCACACTGGCGTGAAA    |
| G6Pase           | CCGGATCTACCTTGCTGCTCACTTT | TAGCAGGTAGAATCCAAGCGCGAAAC |
| PEPCK            | CCACAGCTGCTGCAGAACA       | GAAGGGTCGCATGGCAAA         |
| mtDNA specific   | CCGCAAGGGAAAGATGAAAGAC    | TCGTTTGGTTTCGGGGTTTC       |
| nuclear specific | GCCAGCCTCTCCTGATTTTAGTGT  | GGGAACACAAAAGACCTCTTCTGG   |
| b-actin          | TGACCACCAACTGCTTAG        | GGATGCAGGGATGATGTTT        |

**Table S2: Detailed information of the genes analyzed by Real-time PCR**

| <b>Gene</b>    | <b>Full name</b>                                                                         | <b>Mouse Genome Database ID</b> |
|----------------|------------------------------------------------------------------------------------------|---------------------------------|
| TNF - $\alpha$ | tumor necrosis factor-alpha                                                              | MGI:104798                      |
| IL-1 $\beta$   | interleukin 1 beta                                                                       | MGI:96543                       |
| MIP-1 $\alpha$ | macrophage inflammatory protein-1alpha<br>(also known as chemokine (C-C motif) ligand 3) | MGI:98260                       |
| MIP-2          | chemokine (C-X-C motif) ligand 2                                                         | MGI:1340094                     |
| MCP-1          | monocyte chemoattractant protein-1<br>(chemokine (C-C motif) ligand 2)                   | MGI:98259                       |
| $\alpha$ -SMA  | actin, alpha 2, smooth muscle                                                            | MGI:87909                       |
| TGF-b          | transforming growth factor, beta                                                         | MGI:98725                       |
| Fibronectin    | fibronectin 1                                                                            | MGI:95566                       |
| CTGF           | connective tissue growth factor                                                          | MGI:95537                       |
| Collagen1      | collagen, type I                                                                         | MGI:88467                       |
| Ndufa2         | NADH dehydrogenase (ubiquinone) 1 alpha subcomplex, 2                                    | MGI:1343103                     |
| Ndufb3         | NADH dehydrogenase (ubiquinone) 1 beta subcomplex 3                                      | MGI:1913745                     |
| COX17          | cytochrome c oxidase assembly protein 17                                                 | MGI:1333806                     |
| ATP5g1         | ATP synthase, H <sup>+</sup> transporting, mitochondrial F0 complex, subunit c1          | MGI:107653                      |
| UCP1           | uncoupling protein 1 (mitochondrial, proton carrier)                                     | MGI:98894                       |
| UCP3           | uncoupling protein 3 (mitochondrial, proton carrier)                                     | MGI:1099787                     |
| MCAD           | acyl-Coenzyme A dehydrogenase, medium chain                                              | MGI:87867                       |
| ACO            | Acyl-CoA oxidase                                                                         | MGI:1330812                     |
| ACC1           | acetyl-CoA carboxylase 1                                                                 | MGI:108451                      |
| ACC2           | acetyl-CoA carboxylase 2                                                                 | MGI:2140940                     |
| GK             | glucokinase                                                                              | MGI:1270854                     |
| G6Pase         | glucose-6-phosphatase                                                                    | MGI:95607                       |
| PEPCK          | phosphoenolpyruvate carboxykinase                                                        | MGI:1860456                     |
| b-actin        | actin, beta                                                                              | MGI:87904                       |
